# Supplementary material for: Exceeding the filling fraction limit in CoSb3 skutterudite: multi-role chemistry of praseodymium leading to promising thermoelectric performance
Source: Royal Society of Chemistry journal article supplement (doi:10.1039/c4ta00600c), 2014-01-01
Supplement: c4ta00600c1.pdf [file c4ta00600c1.pdf]

Supplemental Material

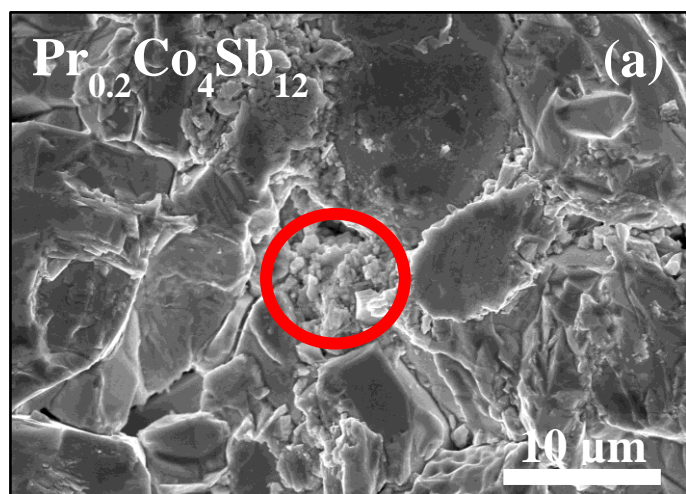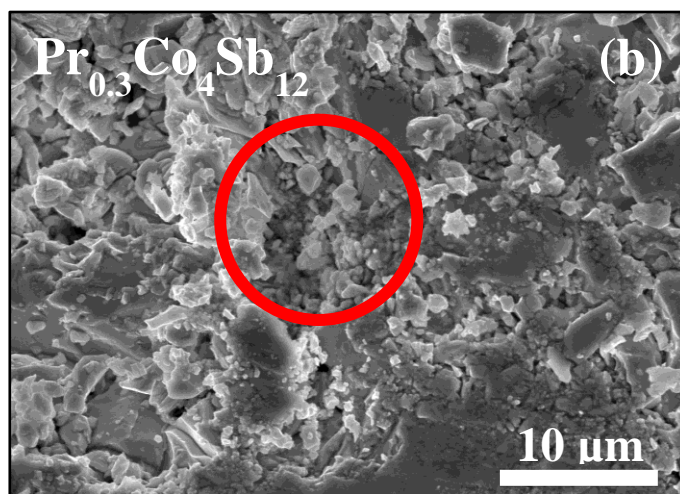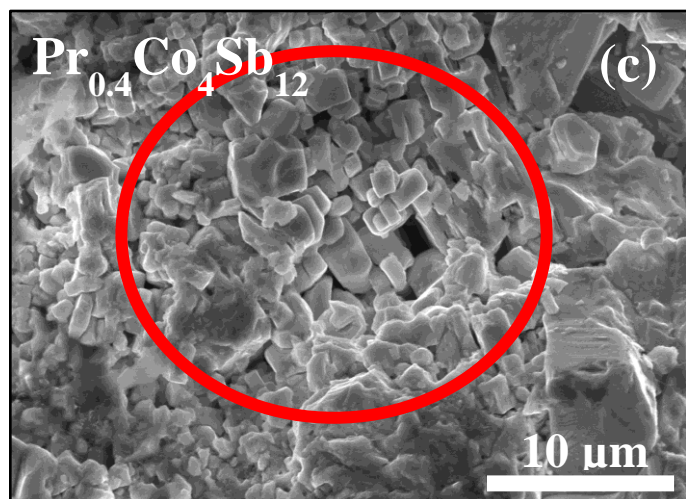

Supplemental Table I.

| Sample                                     | Pr (at%) | Sb (at%) | Totals                      |
|--------------------------------------------|----------|----------|-----------------------------|
| $\text{Pr}_{0.2}\text{Co}_4\text{Sb}_{12}$ | 68.28    | 31.72    | $\text{Pr}_{2.15}\text{Sb}$ |
| $\text{Pr}_{0.3}\text{Co}_4\text{Sb}_{12}$ | 69.14    | 30.86    | $\text{Pr}_{2.24}\text{Sb}$ |
| $\text{Pr}_{0.4}\text{Co}_4\text{Sb}_{12}$ | 69.79    | 30.21    | $\text{Pr}_{2.31}\text{Sb}$ |

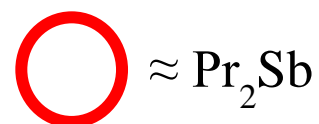

Supp. Fig. 1. SEM images of probable secondary phase  $\text{Pr}_2\text{Sb}$  in samples (a)  $\text{Pr}_{0.2}\text{Co}_4\text{Sb}_{12}$  (b)  $\text{Pr}_{0.3}\text{Co}_4\text{Sb}_{12}$  and (c)  $\text{Pr}_{0.4}\text{Co}_4\text{Sb}_{12}$ . Table II at bottom right is atomic percent of Praseodymium and Antimony found in each sample and the total estimated composition of  $\text{Pr}_2\text{Sb}$  found in each SEM image

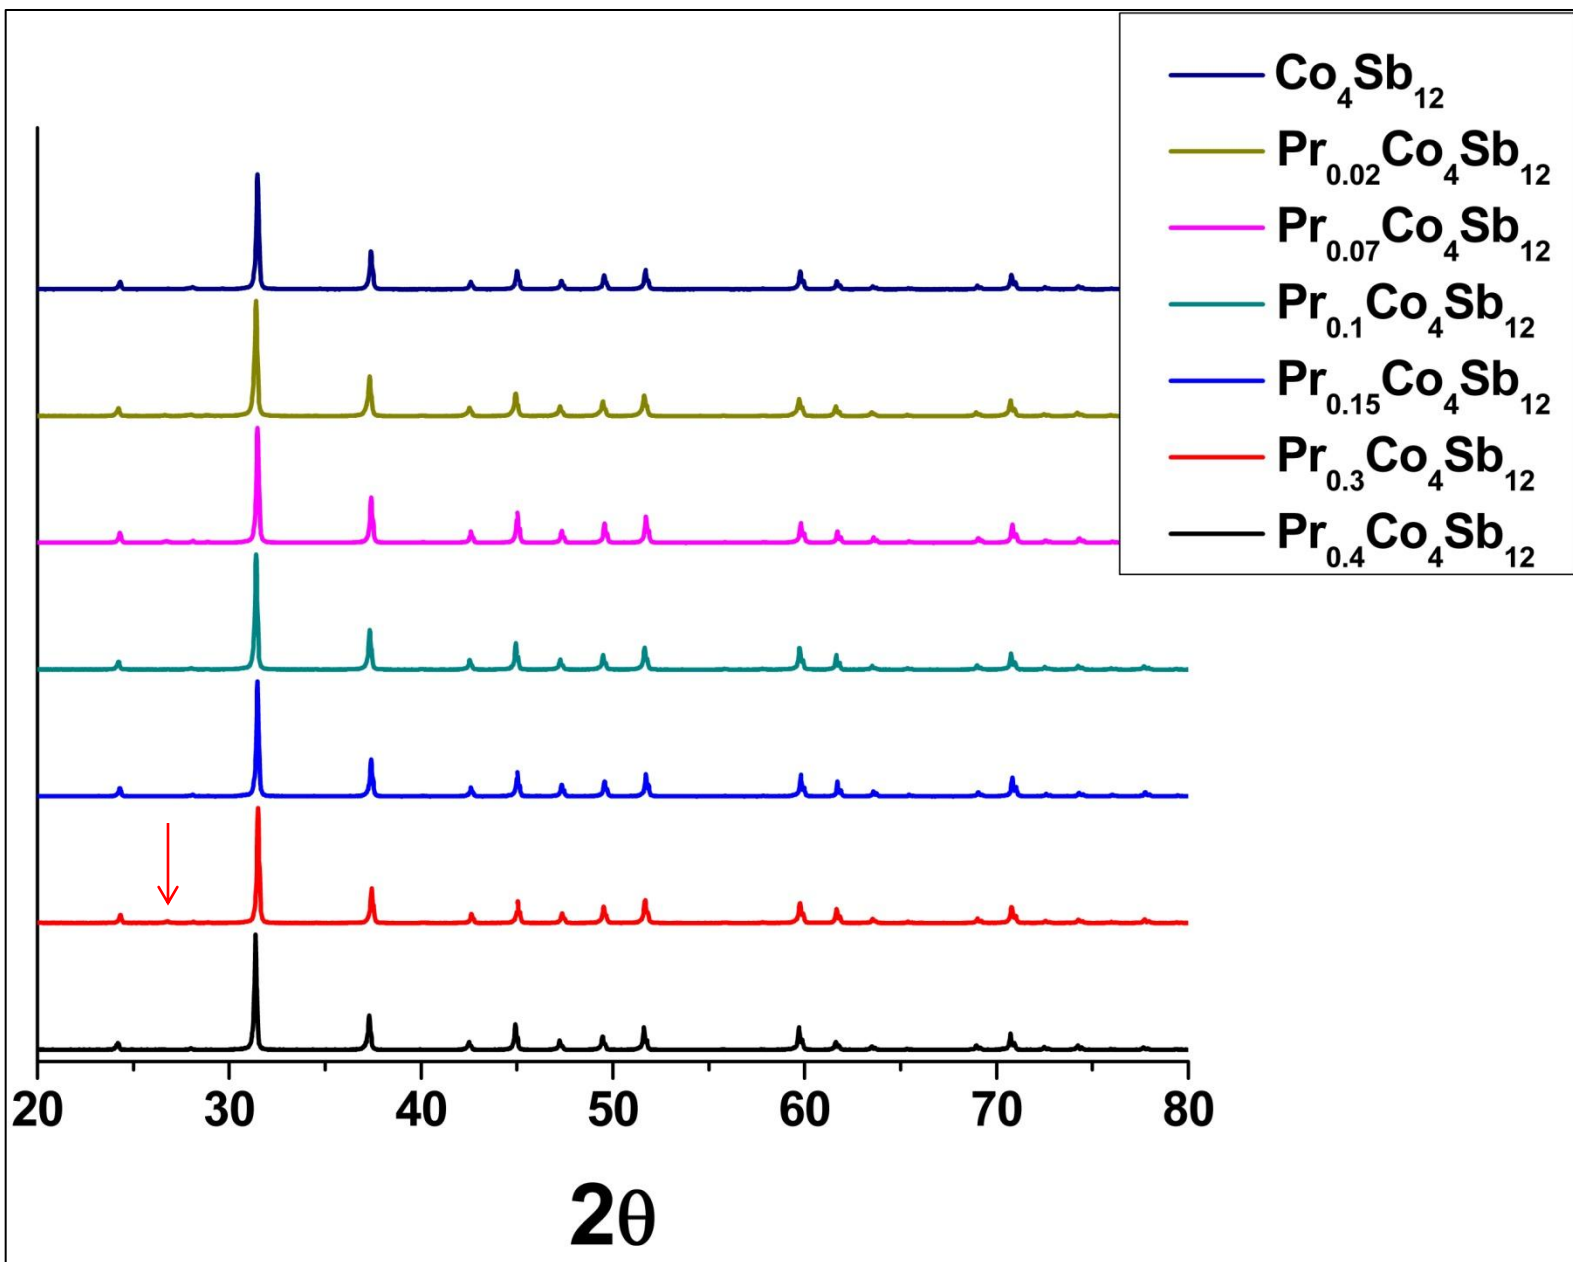

Supp. Fig. 2. High resolution X-ray diffraction (HRXRD) of all samples  $\text{Pr}_y\text{Co}_4\text{Sb}_{12}$  ( $0.02 < y < 0.4$ ) prepared in manuscript. There is little to no secondary phases found in the HRXRD of the samples. All prominent peaks are  $\text{Co}_4\text{Sb}_{12}$ , except for the arrow pointing out a small presence of secondary phase which is found in all samples.

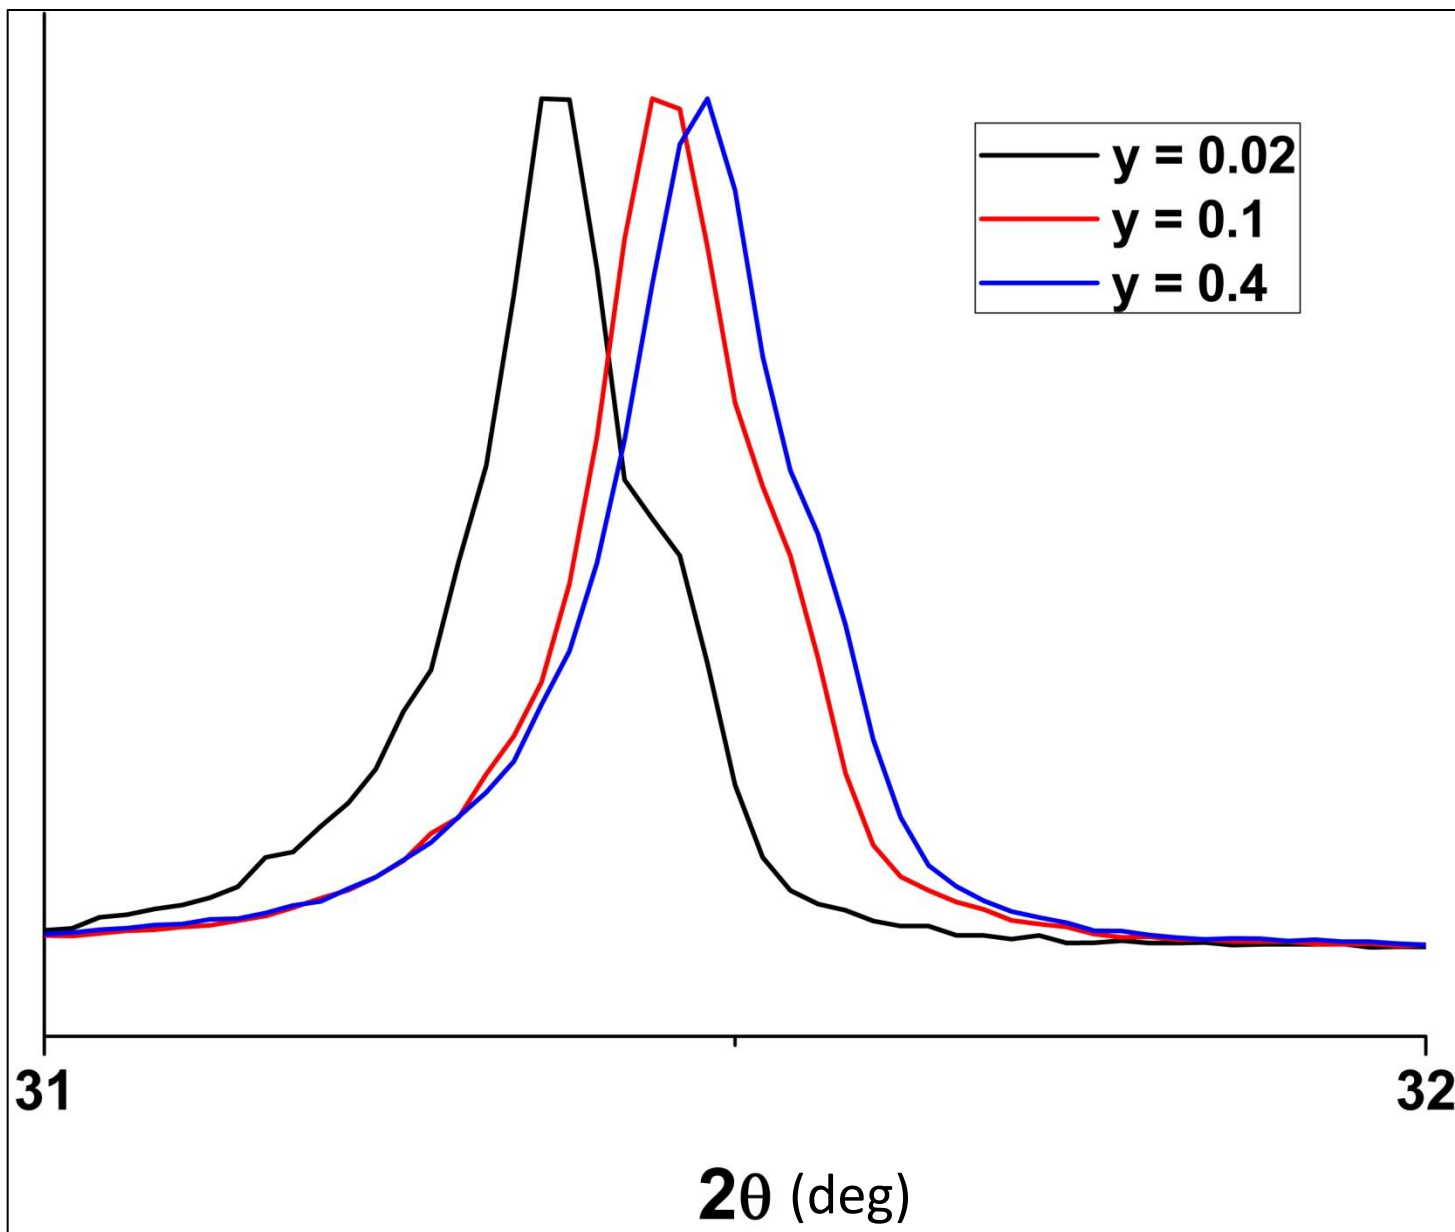

Supp. Fig. 3. High resolution X-ray diffraction (HRXRD) zoom of largest intensity peak in samples  $\text{Pr}_y\text{Co}_4\text{Sb}_{12}$  ( $y = 0.02, 0.1, \text{ and } 0.4$ ) prepared in manuscript. There is a noticeable peak shift to higher  $2\theta$  (deg) as more Pr is added to the  $\text{Co}_4\text{Sb}_{12}$  skutterudite suggesting a decrease in the lattice parameter.
